# Supplementary material
Source: publisher figshare collection journal article supplement (https://gsapubs.figshare.com/articles/dataset/_/25289545)
Supplement: Supplementary file 1 [file 1]

Kapolas, A., Finzel, E.S., Horkley, L.K., and Peate, D.W., 2024, The effects of weathering and sedimentary source mixing on whole-rock geochemical provenance studies, Cook Inlet forearc basin, south-central Alaska, USA: GSA Bulletin, <https://doi.org/10.1130/B37418.1>.

## Supplemental Material

**Table S1.** Major oxide compositions of the basin samples.

**Table S2.** Trace element compositions of the basin samples.
